# Supplementary material for: High precision zircon SIMS Zr isotope analysis
Source: Royal Society of Chemistry journal article supplement (doi:10.1039/d1ja00245g), 2021-01-01
Supplement: d1ja00245g1.xlsx [file d1ja00245g1.xlsx]

## Sheet: Penglai
Table S1 Zr isotopic data of Penglai measured by SIMS
Figure	Sample	Date	IP (nA)	90Zr (cps)	94Zr (cps)	94Zr/90Zr ratio	2σ	Raw δ94Zr	δ94Zr (‰, IPGP-Zr)	2σ	X (µm)	Y (µm)	DTFA-X	DTFA-Y	DTCA-X
Fig. 6B	Penglai@01	2021-02-13 21:54:00	30.2334	288765100	92646910	0.320838	0.00120422	-50.1863	-0.0822215	0.0240844	-4633	-1772	-11	14	2
	Penglai@02	2021-02-13 21:58:00	30.1721	291139700	93405080	0.320823	0.00136991	-50.2298	-0.12574	0.0273983	-4533	-1672	-8	14	1
	Penglai@03	2021-02-13 22:03:00	30.3384	290178800	93098680	0.32083	0.0010938	-50.21	-0.105905	0.0218759	-4733	-1672	-8	13	3
	Penglai@04	2021-02-13 22:07:00	30.3065	291329600	93465700	0.320825	0.00146475	-50.2263	-0.122187	0.029295	-4233	-1572	-5	13	-1
	Penglai@05	2021-02-13 22:11:00	30.3242	291586500	93545850	0.320814	0.00153217	-50.2588	-0.154752	0.0306434	-4433	-1572	-6	13	2
	Penglai@06	2021-02-13 22:15:00	30.3477	291012200	93365250	0.320827	0.00149441	-50.2201	-0.11597	0.0298882	-4633	-1572	-7	13	1
	Penglai@07	2021-02-13 22:19:00	30.3788	291528900	93530460	0.32083	0.00179939	-50.2109	-0.106793	0.0359878	-4833	-1572	-9	12	4
	Penglai@08	2021-02-13 22:23:00	30.3632	292476000	93837290	0.320837	0.00164429	-50.1881	-0.0839977	0.0328859	-4733	-1472	-7	12	2
	Penglai@09	2021-02-13 22:27:00	30.3616	292988500	93998770	0.320824	0.00178927	-50.2272	-0.123075	0.0357854	-4533	-1472	-6	12	2
	Penglai@10	2021-02-13 22:32:00	30.416	292698700	93901790	0.320817	0.00121192	-50.2494	-0.145278	0.0242385	-4333	-1472	-4	13	2
	Penglai@11	2021-02-13 22:36:00	30.412	292733600	93916870	0.320827	0.00147824	-50.2189	-0.114786	0.0295647	-4133	-1472	-4	13	0
	Penglai@12	2021-02-13 22:40:00	30.3924	293360800	94124490	0.320846	0.00125152	-50.1623	-0.0582421	0.0250304	-4833	-1372	-6	12	1
	Penglai@13	2021-02-13 22:44:00	30.406	293189700	94068920	0.320849	0.00121252	-50.154	-0.049953	0.0242505	-4633	-1372	-5	12	3
	Penglai@14	2021-02-13 22:48:00	30.3784	293394300	94131180	0.320832	0.00159131	-50.2032	-0.0990959	0.0318263	-4433	-1372	-5	11	1
	Penglai@15	2021-02-13 22:52:00	30.3409	293381600	94127660	0.320837	0.00182233	-50.1899	-0.085774	0.0364465	-4233	-1372	-4	10	0
	Penglai@16	2021-02-13 22:57:00	30.3834	292802500	93940810	0.320833	0.00127945	-50.2011	-0.0970236	0.0255891	-4033	-1372	-4	11	0
	Penglai@17	2021-02-13 23:01:00	30.3704	292976300	93993040	0.320819	0.00165881	-50.2443	-0.140246	0.0331763	-3733	-1272	-2	10	-1
	Penglai@18	2021-02-13 23:05:00	30.3456	293378700	94123400	0.320825	0.00154389	-50.2236	-0.119523	0.0308779	-3933	-1272	-2	10	-1
	Penglai@19	2021-02-13 23:09:00	30.349	293288900	94094860	0.320824	0.00125321	-50.2269	-0.122779	0.0250642	-4133	-1272	-2	10	-1
	Penglai@20	2021-02-13 23:13:00	30.3237	293809700	94263400	0.320831	0.00144354	-50.2061	-0.102056	0.0288708	-4333	-1272	-3	10	0
	Penglai@21	2021-02-13 23:17:00	30.3544	293635800	94208570	0.320837	0.00156713	-50.189	-0.0848859	0.0313426	-4533	-1272	-4	10	1
	Penglai@22	2021-02-13 23:22:00	30.3228	293313500	94104210	0.320834	0.00101178	-50.1987	-0.0946552	0.0202355	-4733	-1272	-5	10	2
	Penglai@23	2021-02-13 23:26:00	30.3467	293010600	94007690	0.320834	0.00138754	-50.1987	-0.0946552	0.0277509	-4933	-1272	-6	11	2
	Penglai@24	2021-02-13 23:30:00	30.358	294361400	94428250	0.320788	0.00103427	-50.3349	-0.230834	0.0206854	-3633	-1172	-1	10	-2
	Penglai@25	2021-02-13 23:34:00	30.443	295203900	94710760	0.320832	0.00220323	-50.2056	-0.101464	0.0440646	-3833	-1172	2	10	-2
	Penglai@26	2021-02-13 23:38:00	30.4047	294580100	94506540	0.320818	0.00186095	-50.2467	-0.142614	0.037219	-4033	-1172	2	11	0
	Penglai@27	2021-02-13 23:42:00	30.399	294892100	94614890	0.320846	0.00160859	-50.1635	-0.0594263	0.0321718	-4233	-1172	2	11	0
	Penglai@28	2021-02-13 23:47:00	30.4022	295169200	94699540	0.320828	0.00129382	-50.2159	-0.111826	0.0258764	-4433	-1172	1	10	1
	Penglai@29	2021-02-13 23:51:00	30.4171	295218800	94720750	0.320854	0.00100226	-50.1384	-0.0342628	0.0200451	-4633	-1172	0	10	1
	Penglai@30	2021-02-13 23:55:00	30.3938	294744100	94566430	0.320837	0.00117869	-50.1896	-0.085478	0.0235737	-4833	-1172	-3	11	2
	Penglai@31	2021-02-13 23:59:00	30.4365	295492900	94806830	0.320846	0.00165523	-50.1638	-0.0597223	0.0331047	-5033	-1172	-5	10	2
	Penglai@32	2021-02-14 00:03:00	30.5389	296377500	95092300	0.320851	0.00124824	-50.1478	-0.0437361	0.0249648	-5133	-1072	-5	10	2
	Penglai@33	2021-02-14 00:07:00	30.6329	297530400	95461680	0.320844	0.00129799	-50.1674	-0.0632748	0.0259599	-4933	-1072	-5	10	3
	Penglai@34	2021-02-14 00:11:00	30.722	298296500	95707770	0.320846	0.00128995	-50.1644	-0.0603144	0.025799	-4733	-1072	-3	10	2
	Penglai@35	2021-02-14 00:16:00	30.6897	298459000	95758390	0.320843	0.00147407	-50.1727	-0.0686036	0.0294814	-4533	-1072	-2	10	1
	Penglai@36	2021-02-14 00:20:00	30.7061	298333100	95717290	0.320838	0.00160188	-50.1875	-0.0834057	0.0320376	-4333	-1072	-2	10	1
	Penglai@37	2021-02-14 00:24:00	30.71	299104600	95966280	0.320845	0.00157857	-50.1653	-0.0612026	0.0315714	-4133	-1072	0	10	-1
	Penglai@38	2021-02-14 00:28:00	30.7739	299058500	95950860	0.320843	0.00180949	-50.1715	-0.0674194	0.0361898	-3933	-1072	0	9	-1
	Penglai@39	2021-02-14 00:32:00	30.7737	299333600	96035630	0.320829	0.00120766	-50.2133	-0.109161	0.0241532	-3733	-1072	1	9	-2
	Penglai@40	2021-02-14 00:37:00	30.8171	299144100	95983390	0.32086	0.00164367	-50.1215	-0.0173884	0.0328734	-5233	-972	-5	9	2
	Penglai@41	2021-02-14 00:41:00	30.8057	299005300	95936430	0.320851	0.000721875	-50.1469	-0.042848	0.0144375	-5033	-972	-4	9	2
	Penglai@42	2021-02-14 00:45:00	30.7885	299021300	95937900	0.320837	0.00136893	-50.1896	-0.085478	0.0273786	-4833	-972	-2	9	2
	Penglai@43	2021-02-14 00:49:00	30.8034	299293500	96026410	0.320838	0.00106661	-50.1857	-0.0816294	0.0213323	-4633	-972	-1	9	2
	Penglai@44	2021-02-14 00:53:00	30.7406	298318700	95710750	0.320834	0.00126022	-50.1979	-0.0937671	0.0252044	-4433	-972	-1	9	2
	Penglai@45	2021-02-14 00:57:00	30.6652	297956400	95589660	0.320818	0.00206866	-50.247	-0.14291	0.0413732	-4233	-972	-1	9	1
	Penglai@46	2021-02-14 01:01:00	30.6382	297569100	95466410	0.320824	0.00142602	-50.2292	-0.125148	0.0285204	-4033	-972	0	9	0
	Penglai@47	2021-02-14 01:06:00	30.6042	297959100	95595320	0.320834	0.00115553	-50.1979	-0.0937671	0.0231107	-3833	-972	1	8	-2
	Penglai@48	2021-02-14 01:10:00	30.5986	297381200	95405850	0.32082	0.00162337	-50.2399	-0.135805	0.0324675	-3933	-872	1	8	-2
	Penglai@49	2021-02-14 01:14:00	30.5643	297552500	95462250	0.320825	0.00134205	-50.2254	-0.121299	0.0268411	-4133	-872	1	7	-1
	Penglai@50	2021-02-14 01:18:00	30.5404	297305500	95384810	0.320831	0.00132434	-50.2073	-0.10324	0.0264867	-4333	-872	0	8	0
	Penglai@51	2021-02-14 01:22:00	30.5336	297196400	95348620	0.320823	0.00174935	-50.2295	-0.125444	0.0349869	-4533	-872	0	8	0
	Penglai@52	2021-02-14 01:26:00	30.5418	297111200	95324080	0.320834	0.00146043	-50.1987	-0.0946552	0.0292085	-4733	-872	-1	8	0
	Penglai@53	2021-02-14 01:31:00	30.4955	296571100	95147940	0.320827	0.00174394	-50.2201	-0.11597	0.0348788	-4933	-872	-2	8	2
	Penglai@54	2021-02-14 01:35:00	30.5008	296448300	95113110	0.320842	0.00118311	-50.1742	-0.0700838	0.0236621	-5133	-872	-3	8	2
	Penglai@55	2021-02-14 01:39:00	30.4751	295613200	94844940	0.320845	0.00159438	-50.165	-0.0609065	0.0318876	-5333	-872	-5	8	2
	Penglai@56	2021-02-14 01:43:00	30.4403	297438200	95417820	0.320798	0.00111102	-50.3047	-0.200638	0.0222205	-3833	-772	3	5	-3
	Penglai@57	2021-02-14 01:47:00	30.4714	297700800	95510890	0.320825	0.00184289	-50.2242	-0.120115	0.0368579	-4033	-772	4	6	-3
	Penglai@58	2021-02-14 01:52:00	30.4977	297466900	95437040	0.320833	0.00158303	-50.2029	-0.0987998	0.0316605	-4233	-772	2	6	-1
	Penglai@59	2021-02-14 01:56:00	30.4963	297954400	95591440	0.320828	0.00134976	-50.215	-0.110938	0.0269952	-4433	-772	2	6	0
	Penglai@60	2021-02-14 02:00:00	30.6173	299072800	95954310	0.320842	0.00150033	-50.1745	-0.0703798	0.0300065	-4633	-772	1	7	0
	Penglai@61	2021-02-14 02:04:00	30.7296	299780600	96182080	0.320842	0.00151789	-50.1762	-0.0721561	0.0303579	-4833	-772	0	7	1
	Penglai@62	2021-02-14 02:08:00	30.7388	299855600	96207040	0.320847	0.00131602	-50.1603	-0.0561699	0.0263203	-5033	-772	-2	7	0
	Penglai@63	2021-02-14 02:12:00	30.7803	299541300	96107720	0.320852	0.00162138	-50.1446	-0.0404797	0.0324277	-5233	-772	-3	8	2
	Penglai@64	2021-02-14 02:16:00	30.7931	298864100	95891550	0.320851	0.00103921	-50.1484	-0.0443282	0.0207843	-5433	-772	-4	8	3
	Penglai@65	2021-02-14 02:21:00	30.7953	299730500	96167250	0.32085	0.00188692	-50.1523	-0.0481767	0.0377384	-5333	-672	-2	7	3
	Penglai@66	2021-02-14 02:25:00	30.7926	300286200	96348280	0.320853	0.000983531	-50.1413	-0.0372232	0.0196706	-5133	-672	-2	7	2
	Penglai@67	2021-02-14 02:29:00	30.7071	300447000	96397050	0.320848	0.00104697	-50.1564	-0.0523213	0.0209394	-4933	-672	0	6	3
	Penglai@68	2021-02-14 02:33:00	30.723	300210700	96317030	0.320834	0.0012991	-50.1993	-0.0952473	0.025982	-4733	-672	0	5	0
	Penglai@69	2021-02-14 02:37:00	30.7491	300374000	96368250	0.320827	0.0015025	-50.2177	-0.113602	0.03005	-4533	-672	1	5	0
	Penglai@70	2021-02-14 02:41:00	30.7464	300731500	96479790	0.320817	0.00174846	-50.2488	-0.144686	0.0349692	-4333	-672	2	4	0
	Penglai@71	2021-02-14 02:45:00	30.759	301270900	96654770	0.320823	0.00190445	-50.2295	-0.125444	0.038089	-4133	-672	3	4	-2
	Penglai@72	2021-02-14 02:50:00	30.7575	301061000	96586250	0.32082	0.00175128	-50.2411	-0.136989	0.0350257	-3933	-672	5	4	-3
	Penglai@73	2021-02-14 02:54:00	30.7224	299921400	96223100	0.320828	0.00186845	-50.2171	-0.11301	0.0373689	-5233	-572	0	5	3
	Penglai@74	2021-02-14 02:58:00	30.7207	300251300	96331450	0.320839	0.00170903	-50.1839	-0.0798532	0.0341805	-5033	-572	2	5	1
	Penglai@75	2021-02-14 03:02:00	30.6612	300326900	96354550	0.320832	0.00141481	-50.2035	-0.0993919	0.0282962	-4833	-572	0	4	0
	Penglai@76	2021-02-14 03:06:00	30.6173	300145400	96291370	0.320816	0.00121488	-50.2506	-0.146462	0.0242976	-4633	-572	1	3	1
	Penglai@77	2021-02-14 03:11:00	30.6679	300354400	96358930	0.320814	0.00119767	-50.2565	-0.152383	0.0239534	-4433	-572	3	3	0
Fig 6D	Penglai@78	2021-02-14 03:15:00	30.6681	292786400	93926070	0.320801	0.0015244	-50.2973	-0.140614	0.0304881	88	-2580	-7	15	-1
	Penglai@79	2021-02-14 03:19:00	30.5795	291985200	93667840	0.320799	0.00136303	-50.3015	-0.144758	0.0272606	-112	-2580	-8	16	0
	Penglai@80	2021-02-14 03:23:00	30.6046	292288900	93773390	0.320824	0.00149309	-50.2272	-0.0704518	0.0298618	-312	-2580	-7	16	-1
	Penglai@81	2021-02-14 03:27:00	30.609	292013500	93683830	0.320817	0.00149556	-50.2476	-0.0908787	0.0299113	-512	-2580	-8	16	0
	Penglai@82	2021-02-14 03:31:00	30.5672	292492500	93836900	0.320818	0.00166029	-50.2455	-0.0888064	0.0332059	-1012	-2480	-9	15	1
	Penglai@83	2021-02-14 03:36:00	30.5337	292879300	93962030	0.320822	0.00142414	-50.2349	-0.0781489	0.0284827	-812	-2480	-8	15	1
	Penglai@84	2021-02-14 03:40:00	30.5234	292056900	93698880	0.320824	0.00141348	-50.2278	-0.0710439	0.0282697	-612	-2480	-8	16	1
	Penglai@85	2021-02-14 03:44:00	30.5261	291630200	93564700	0.320833	0.00151674	-50.2029	-0.0461764	0.0303348	-412	-2480	-8	16	1
	Penglai@86	2021-02-14 03:48:00	30.4098	290655700	93247960	0.320821	0.000974821	-50.236	-0.0793331	0.0194964	-212	-2480	-9	15	0
	Penglai@87	2021-02-14 03:52:00	30.2715	290022600	93042950	0.320813	0.00191029	-50.2615	-0.104793	0.0382058	-12	-2480	-9	15	1
	Penglai@88	2021-02-14 03:56:00	30.3567	290318500	93139130	0.320817	0.00137613	-50.2488	-0.0920629	0.0275227	88	-2380	-8	15	0
	Penglai@89	2021-02-14 04:01:00	30.3296	290272400	93119990	0.320803	0.00102569	-50.2914	-0.134693	0.0205139	-112	-2380	-8	15	0
	Penglai@90	2021-02-14 04:05:00	30.3393	290543000	93213190	0.320824	0.00155199	-50.2281	-0.07134	0.0310398	-312	-2380	-8	15	-1
	Penglai@91	2021-02-14 04:09:00	30.3259	290176200	93095820	0.320825	0.00145979	-50.2266	-0.0698598	0.0291959	-512	-2380	-9	15	0
	Penglai@92	2021-02-14 04:13:00	30.3243	290385700	93161590	0.320823	0.00166088	-50.2307	-0.0740043	0.0332177	-712	-2380	-9	15	0
	Penglai@93	2021-02-14 04:17:00	30.3399	290514400	93201300	0.320813	0.00109136	-50.2621	-0.105385	0.0218272	-912	-2380	-9	15	1
	Penglai@94	2021-02-14 04:21:00	30.3346	290231600	93107810	0.320803	0.00128758	-50.2896	-0.132917	0.0257515	-1112	-2380	-9	14	0
	Penglai@95	2021-02-14 04:26:00	30.3317	291464600	93510530	0.32083	0.00133244	-50.2112	-0.0544656	0.0266488	-1012	-2280	-9	14	-1
	Penglai@96	2021-02-14 04:30:00	30.372	290043900	93040280	0.320777	0.0013209	-50.366	-0.209295	0.0264179	-812	-2280	-8	14	0
	Penglai@97	2021-02-14 04:34:00	30.3383	292490000	93835220	0.320813	0.00114251	-50.2609	-0.104201	0.0228501	-612	-2280	-9	14	1
	Penglai@98	2021-02-14 04:38:00	30.4699	292051400	93695660	0.320821	0.00104597	-50.2372	-0.0805172	0.0209194	-412	-2280	-6	14	0
	Penglai@99	2021-02-14 04:42:00	30.4611	292132700	93722740	0.320823	0.00104625	-50.2325	-0.0757806	0.0209251	-212	-2280	-6	14	-1
	Penglai@100	2021-02-14 04:46:00	30.4682	292237200	93754160	0.320815	0.00140941	-50.2538	-0.0970956	0.0281882	-12	-2280	-6	14	-1
	Penglai@101	2021-02-14 04:50:00	30.4772	292912100	93971010	0.320822	0.00120875	-50.2337	-0.0769647	0.024175	188	-2280	-6	13	-2
	Penglai@102	2021-02-14 04:55:00	30.4962	293554800	94181920	0.320833	0.0016714	-50.2029	-0.0461764	0.033428	-912	-2180	-6	13	-1
	Penglai@103	2021-02-14 04:59:00	30.5057	292749000	93920270	0.320824	0.00150512	-50.2269	-0.0701558	0.0301024	-712	-2180	-7	14	1
	Penglai@104	2021-02-14 05:03:00	30.5157	293377900	94121230	0.320819	0.00178568	-50.2426	-0.085846	0.0357135	-512	-2180	-6	14	0
	Penglai@105	2021-02-14 05:07:00	30.5216	293076800	94028970	0.320831	0.000747479	-50.2061	-0.0494329	0.0149496	-312	-2180	-5	13	0
	Penglai@106	2021-02-14 05:11:00	30.4465	292093500	93709900	0.320825	0.00128772	-50.2263	-0.0695637	0.0257544	-112	-2180	-7	13	0
	Penglai@107	2021-02-14 05:15:00	30.4304	291779300	93608890	0.320818	0.00121829	-50.2446	-0.0879183	0.0243658	88	-2180	-6	13	-1
	Penglai@108	2021-02-14 05:20:00	30.3903	291813800	93615690	0.320806	0.00211921	-50.2807	-0.124035	0.0423842	288	-2180	-6	12	-2
	Penglai@109	2021-02-14 05:24:00	30.3506	291617100	93551820	0.320807	0.00133613	-50.2793	-0.122555	0.0267225	188	-2080	-5	12	-2
	Penglai@110	2021-02-14 05:28:00	30.379	292113900	93717110	0.320827	0.00152487	-50.2201	-0.0633468	0.0304974	-12	-2080	-2	12	-2
	Penglai@111	2021-02-14 05:32:00	30.3532	291606900	93550920	0.320812	0.00122168	-50.2639	-0.107161	0.0244337	-212	-2080	-3	12	-2
	Penglai@112	2021-02-14 05:36:00	30.3302	291610000	93557490	0.320835	0.00204891	-50.197	-0.0402556	0.0409781	-412	-2080	-3	13	-1
	Penglai@113	2021-02-14 05:40:00	30.2887	290313100	93139650	0.320825	0.00148981	-50.2257	-0.0689716	0.0297962	-612	-2080	-4	13	-1
	Penglai@114	2021-02-14 05:45:00	30.1637	290158500	93085930	0.320807	0.00160402	-50.2778	-0.121075	0.0320803	-812	-2080	-7	12	0
	Penglai@115	2021-02-14 05:49:00	30.1436	289597900	92899640	0.320788	0.00219356	-50.3337	-0.177027	0.0438712	88	-1980	-4	11	0
	Penglai@116	2021-02-14 05:53:00	30.1067	289013700	92715090	0.320794	0.00107305	-50.3169	-0.160152	0.0214611	-112	-1980	-4	12	-1
	Penglai@117	2021-02-14 05:57:00	30.0902	289122900	92753390	0.32081	0.00166014	-50.2707	-0.11397	0.0332028	-312	-1980	-4	12	-1
	Penglai@118	2021-02-14 06:01:00	30.1044	288902000	92687350	0.320821	0.00118873	-50.2357	-0.079037	0.0237745	-512	-1980	-4	12	0
	Penglai@119	2021-02-14 06:05:00	29.9988	288697900	92617690	0.320812	0.00157998	-50.2642	-0.107457	0.0315995	-712	-1980	-5	12	0
	Penglai@120	2021-02-14 06:09:00	30.0114	288626500	92595840	0.320818	0.00145788	-50.2455	-0.0888064	0.0291577	-612	-1880	-5	11	1
	Penglai@121	2021-02-14 06:14:00	29.9286	287730200	92308150	0.320818	0.00161332	-50.2467	-0.0899906	0.0322665	-412	-1880	-5	11	0
	Penglai@122	2021-02-14 06:18:00	29.8763	287215200	92124220	0.320809	0.00163078	-50.2731	-0.116338	0.0326155	-212	-1880	-4	11	0
	Penglai@123	2021-02-14 06:22:00	29.8147	287494400	92229180	0.3208	0.00155159	-50.2982	-0.141502	0.0310318	-512	-1780	-4	11	-1
	Penglai@124	2021-02-14 06:26:00	29.8769	287733300	92309030	0.320811	0.00168047	-50.2656	-0.108937	0.0336095	-312	-1780	-3	11	0
Fig 6F	Penglai@01	2021-02-15 09:39:00	31.7052	299498300	96072570	0.320778	0.0017074	-50.3633	-0.125129	0.034148	-1824	-2534	14	14	0
	Penglai@02	2021-02-15 09:43:00	31.7045	299490900	96069670	0.320779	0.00116508	-50.3598	-0.121577	0.0233016	-2624	-2334	13	13	3
	Penglai@03	2021-02-15 09:47:00	31.6334	299859200	96191690	0.320786	0.00160593	-50.3394	-0.10115	0.0321185	-2424	-2334	14	13	2
	Penglai@04	2021-02-15 09:52:00	31.6589	299995500	96235390	0.320792	0.0014281	-50.3237	-0.0854597	0.0285621	-2224	-2334	14	13	1
	Penglai@05	2021-02-15 09:56:00	31.6128	299086600	95943390	0.32079	0.00157937	-50.3272	-0.0890122	0.0315874	-2024	-2334	15	13	1
	Penglai@06	2021-02-15 10:00:00	31.5307	298264900	95678180	0.320786	0.0016666	-50.342	-0.103814	0.033332	-1824	-2334	16	13	1
	Penglai@07	2021-02-15 10:04:00	31.4447	297829100	95538670	0.320787	0.0020492	-50.3373	-0.0990776	0.040984	-1824	-2134	19	12	-1
	Penglai@08	2021-02-15 10:08:00	31.376	297035600	95287090	0.320799	0.00167551	-50.3027	-0.0644407	0.0335102	-2024	-2134	18	12	-1
	Penglai@09	2021-02-15 10:12:00	31.2905	296556800	95132380	0.32079	0.00176723	-50.3296	-0.0913805	0.0353447	-2224	-2134	17	12	0
	Penglai@10	2021-02-15 10:17:00	31.2294	295972800	94944180	0.320787	0.00160578	-50.3382	-0.0999657	0.0321157	-2424	-2134	17	12	1
	Penglai@11	2021-02-15 10:21:00	31.141	295487100	94787330	0.320786	0.00175102	-50.34	-0.101742	0.0350204	-2624	-2134	16	11	2
	Penglai@12	2021-02-15 10:25:00	31.1939	295410200	94763660	0.320783	0.00194554	-50.3485	-0.110327	0.0389108	-2824	-2134	14	11	2
	Penglai@13	2021-02-15 10:29:00	31.1543	295983500	94946760	0.320784	0.00179538	-50.3465	-0.108255	0.0359076	-3024	-1934	14	10	2
	Penglai@14	2021-02-15 10:33:00	31.1238	295783600	94885320	0.320795	0.00136588	-50.313	-0.0748022	0.0273176	-2824	-1934	15	10	3
	Penglai@15	2021-02-15 10:37:00	31.0747	295806900	94893150	0.320796	0.0011175	-50.3098	-0.0715457	0.02235	-2624	-1934	15	11	2
	Penglai@16	2021-02-15 10:41:00	31.1143	295898500	94917890	0.320778	0.00116293	-50.363	-0.124833	0.0232586	-2424	-1934	15	11	2
	Penglai@17	2021-02-15 10:46:00	31.1331	296660800	95168750	0.320797	0.001729	-50.3086	-0.0703615	0.03458	-2224	-1934	15	11	1
	Penglai@18	2021-02-15 10:50:00	31.1672	296924000	95249990	0.320789	0.00168526	-50.3317	-0.0934528	0.0337052	-2024	-1934	16	9	1
	Penglai@19	2021-02-15 10:54:00	31.1843	296426500	95088660	0.32078	0.00173625	-50.358	-0.1198	0.034725	-1824	-1934	17	11	1
	Penglai@20	2021-02-15 10:58:00	31.1975	297016400	95277580	0.320779	0.0013646	-50.3616	-0.123353	0.0272919	-1824	-1734	19	10	0
	Penglai@21	2021-02-15 11:02:00	31.1955	297200300	95341140	0.320794	0.00156921	-50.3154	-0.0771705	0.0313841	-2024	-1734	18	10	0
	Penglai@22	2021-02-15 11:06:00	31.2172	297328900	95379910	0.320789	0.00147225	-50.3308	-0.0925646	0.029445	-2224	-1734	17	10	1
	Penglai@23	2021-02-15 11:11:00	31.2223	297699300	95500490	0.320795	0.00179186	-50.3136	-0.0753942	0.0358372	-2424	-1734	17	10	1
	Penglai@24	2021-02-15 11:15:00	31.256	297547900	95452100	0.320796	0.00166796	-50.3118	-0.073618	0.0333592	-2624	-1734	16	10	2
	Penglai@25	2021-02-15 11:19:00	31.2883	298038800	95605260	0.320781	0.00210428	-50.3548	-0.116544	0.0420856	-2824	-1734	16	9	2
	Penglai@26	2021-02-15 11:23:00	31.3206	298411900	95729070	0.320795	0.00218886	-50.3139	-0.0756903	0.0437773	-3024	-1734	15	9	2
	Penglai@27	2021-02-15 11:27:00	31.3593	299773800	96167470	0.3208	0.00197048	-50.2991	-0.0608882	0.0394095	-2624	-1534	17	8	2
	Penglai@28	2021-02-15 11:31:00	31.3722	299941900	96219890	0.320795	0.00145561	-50.3136	-0.0753942	0.0291123	-2424	-1534	17	8	2
	Penglai@29	2021-02-15 11:35:00	31.3783	299535800	96088670	0.320793	0.001322	-50.3204	-0.0822032	0.0264399	-2224	-1534	17	9	2
	Penglai@30	2021-02-15 11:40:00	31.4196	299532700	96086890	0.320789	0.00190337	-50.3308	-0.0925646	0.0380673	-2024	-1534	18	9	2
	Penglai@31	2021-02-15 11:44:00	31.3782	298912100	95889080	0.32079	0.00194589	-50.3284	-0.0901963	0.0389179	-1824	-1534	21	10	0
	Penglai@32	2021-02-15 11:48:00	31.3469	299717100	96143660	0.320778	0.00187152	-50.3645	-0.126313	0.0374303	-1824	-1334	22	7	0
	Penglai@33	2021-02-15 11:52:00	31.295	298571900	95779320	0.320792	0.00145913	-50.3222	-0.0839794	0.0291826	-2024	-1334	20	8	1
