# Supplementary material for: High precision zircon SIMS Zr isotope analysis
Source: Royal Society of Chemistry journal article supplement (doi:10.1039/d1ja00245g), 2021-01-01
Supplement: d1ja00245g4.xlsx [file d1ja00245g4.xlsx]

## Sheet: Sheet1
Table S4 Zr isotopic results of unknown samples calibrated by reference materials
Figure	Sample	Date	IP (nA)	90Zr (cps)	94Zr (cps)	94Zr/90Zr ratio	2σ	Raw δ94Zr	δ94Zr (‰, IPGP-Zr)	2σ	X (µm)	Y (µm)	DTFA-X	DTFA-Y	DTCA-X
Fig. 9A	91500@01	2021-02-15 13:20:00	31.1442	296922700	95238360	0.320749	0.00279031	-50.4513	-0.0550675	0.0279031	-375	3450	-6	-32	4
	91500@02	2021-02-15 13:25:00	31.123	295922400	94920370	0.320763	0.00204634	-50.4089	-0.0127336	0.0204634	-975	3650	-7	-32	4
	91500@03	2021-02-15 13:29:00	31.1386	293439000	94120330	0.320746	0.00298149	-50.4575	-0.0612844	0.0298149	-1175	3650	-6	-32	4
	91500@04	2021-02-15 13:33:00	30.9665	294461900	94449830	0.320754	0.00288446	-50.4356	-0.0393773	0.0288446	-575	3450	-4	-32	4
	91500@05	2021-02-15 13:37:00	31.0454	293424800	94117260	0.320751	0.00307813	-50.4436	-0.0473704	0.0307813	-775	3450	-4	-32	4
	91500@06	2021-02-15 13:41:00	30.9982	293147300	94028790	0.320756	0.00399656	-50.4294	-0.0331604	0.0399656	-975	3450	-4	-34	3
	91500@07	2021-02-15 13:45:00	30.8704	292597500	93855580	0.320767	0.00303356	-50.3974	-0.00118797	0.0303356	-1175	3450	-3	-34	4
	91500@08	2021-02-15 13:50:00	30.8995	293834900	94253740	0.320769	0.00310515	-50.3903	0.00591702	0.0310515	-975	3250	-5	-34	5
	91500@09	2021-02-15 13:54:00	30.802	292640200	93872430	0.320778	0.0039939	-50.3654	0.0307845	0.039939	-775	3250	-5	-34	6
	91500@10	2021-02-15 13:58:00	30.6984	290972300	93318690	0.320716	0.00303056	-50.5487	-0.152465	0.0303056	-575	3250	-5	-34	6
	91500@11	2021-02-15 14:02:00	30.7227	291577000	93539620	0.320761	0.00238808	-50.414	-0.0177663	0.0238808	-375	3050	-5	-32	4
	91500@12	2021-02-15 14:06:00	30.6085	290659600	93232900	0.32076	0.00352495	-50.4172	-0.0210227	0.0352495	-575	3050	-4	-33	4
	91500@13	2021-02-15 14:10:00	30.5986	290045100	93036360	0.320761	0.00316703	-50.414	-0.0177663	0.0316703	-775	3050	-4	-34	3
	91500@14	2021-02-15 14:15:00	30.5558	289490500	92856210	0.320754	0.00337758	-50.4368	-0.0405615	0.0337758	-975	3050	-4	-33	4
	91500@15	2021-02-15 14:19:00	30.539	288861600	92652320	0.320748	0.0027638	-50.4545	-0.058324	0.027638	-2272	3412	-8	-31	5
	91500@16	2021-02-15 14:23:00	30.3793	287025400	92063140	0.320752	0.00287609	-50.4418	-0.0455942	0.0287609	-2472	3412	-7	-31	4
	91500@17	2021-02-15 14:27:00	30.3576	286749900	91972210	0.32074	0.00416703	-50.4764	-0.080231	0.0416703	-2672	3612	-7	-31	6
	91500@18	2021-02-15 14:31:00	30.3131	286506600	91900860	0.320767	0.00350849	-50.3983	-0.0020761	0.0350849	-2472	3612	-7	-30	6
	91500@19	2021-02-15 14:35:00	30.2456	285962600	91722700	0.320755	0.00270734	-50.4329	-0.0367129	0.0270734	-2672	3812	-6	-30	5
	91500@20	2021-02-15 14:40:00	30.2206	285348800	91524090	0.320745	0.00299639	-50.4631	-0.0669092	0.0299639	-2872	3812	-6	-30	5
	91500@21	2021-02-15 14:44:00	30.226	284660600	91306330	0.320758	0.00337145	-50.4228	-0.0266475	0.0337145	-3072	3812	-8	-30	5
	91500@22	2021-02-15 14:48:00	30.1376	285224800	91487200	0.320757	0.00295536	-50.4258	-0.0296079	0.0295536	-2872	4012	-9	-29	5
	91500@23	2021-02-15 14:52:00	30.14	285392300	91547190	0.320779	0.00232525	-50.3613	0.0349291	0.0232525	-2672	4012	-9	-29	6
	91500@24	2021-02-15 14:56:00	30.1128	286151800	91792650	0.320783	0.00323482	-50.3494	0.0467707	0.0323482	-2272	3612	-9	-30	5
	Plesovice@01	2021-02-15 15:00:00	30.1531	284647500	91329470	0.320851	0.00255546	-50.1484	0.247783	0.0255546	2553	-1682	-3	-28	2
	Plesovice@02	2021-02-15 15:05:00	30.175	284766700	91367500	0.32085	0.00284295	-50.1502	0.246007	0.0284295	2537	-1200	-3	-28	3
	Plesovice@03	2021-02-15 15:09:00	30.1755	283981300	91120480	0.320868	0.00374385	-50.0981	0.29811	0.0374385	1658	-1644	-5	-28	4
	Plesovice@04	2021-02-15 15:13:00	30.2072	284920600	91419320	0.320862	0.0036632	-50.1156	0.280643	0.036632	1852	-1156	-5	-28	4
	Plesovice@05	2021-02-15 15:17:00	30.2525	285122300	91483420	0.320857	0.00292742	-50.1304	0.265841	0.0292742	1061	-1013	-6	-28	2
	Plesovice@06	2021-02-15 15:21:00	30.3058	285735400	91676470	0.320844	0.00283559	-50.1691	0.22706	0.0283559	314	-1458	-8	-27	4
	Plesovice@07	2021-02-15 15:25:00	30.4035	286697900	91989660	0.320856	0.00322607	-50.1345	0.261697	0.0322607	337	-940	-7	-28	3
	Plesovice@08	2021-02-15 15:30:00	30.4589	286378000	91881770	0.320844	0.00303363	-50.1697	0.226468	0.0303363	-304	-1292	-9	-28	4
	Plesovice@09	2021-02-15 15:34:00	29.9928	285915400	91729580	0.320826	0.00310823	-50.2212	0.174957	0.0310823	-873	-1170	-10	-30	6
	Plesovice@10	2021-02-15 15:38:00	30.4433	286147300	91808340	0.320843	0.00245592	-50.1715	0.224692	0.0245592	-1505	-1137	-12	-28	5
	Plesovice@11	2021-02-15 15:42:00	30.4334	285271200	91517650	0.320805	0.00315582	-50.2834	0.112788	0.0315582	-2256	-1077	-14	-29	5
	Plesovice@12	2021-02-15 15:46:00	30.4059	285911900	91743460	0.320883	0.00286504	-50.0537	0.342516	0.0286504	-3302	-1052	-18	-28	7
	Plesovice@13	2021-02-15 15:51:00	30.3602	283329500	90903730	0.320841	0.00292191	-50.1777	0.218475	0.0292191	-3236	-494	-15	-29	5
	Plesovice@14	2021-02-15 15:55:00	30.2177	283437900	90942700	0.320858	0.00240334	-50.1277	0.268506	0.0240334	-4306	-829	-17	-29	8
	Plesovice@15	2021-02-15 15:59:00	30.2113	280270900	89914600	0.320814	0.00240955	-50.2585	0.137655	0.0240955	-4540	-340	-18	-30	6
	Plesovice@16	2021-02-15 16:03:00	30.0579	281226700	90230340	0.320846	0.00357648	-50.1644	0.231797	0.0357648	-4727	-763	-18	-29	7
	Plesovice@17	2021-02-15 16:07:00	30.0946	280355900	89944230	0.320822	0.00295571	-50.2352	0.161043	0.0295571	-5301	-105	-20	-30	8
	Plesovice@18	2021-02-15 16:11:00	30.0184	280131000	89870950	0.320817	0.00382817	-50.2473	0.148905	0.0382817	-5306	-734	-20	-29	7
	Plesovice@19	2021-02-15 16:16:00	30.0101	279857000	89784520	0.320823	0.00315657	-50.2316	0.164595	0.0315657	-5846	-605	-22	-30	8
	Plesovice@20	2021-02-15 16:20:00	29.9931	279487600	89666330	0.320824	0.00345292	-50.2281	0.168148	0.0345292	-5989	-80	-23	-30	7
	Plesovice@21	2021-02-15 16:24:00	29.9727	278599300	89382770	0.320827	0.00235394	-50.2189	0.177325	0.0235394	-6601	-615	-27	-30	8
	Plesovice@22	2021-02-15 16:28:00	29.9161	276477600	88693410	0.320795	0.00316004	-50.3133	0.0828878	0.0316004	-6640	-73	-26	-30	7
	Plesovice@23	2021-02-15 16:32:00	29.7614	277421300	89008930	0.320844	0.00395953	-50.1691	0.22706	0.0395953	-7268	-565	-29	-30	8
	Plesovice@24	2021-02-15 16:36:00	29.8329	276596300	88735720	0.32081	0.00314935	-50.2695	0.126702	0.0314935	-7114	-48	-27	-29	7
	Plesovice@25	2021-02-15 16:41:00	29.701	278264700	89282370	0.320851	0.00323169	-50.1478	0.248375	0.0323169	-5068	-108	-17	-28	6
	Plesovice@26	2021-02-15 16:45:00	29.7112	277622700	89048410	0.320861	0.00349781	-50.1176	0.278571	0.0349781	-5942	-421	-21	-28	6
	Plesovice@27	2021-02-15 16:49:00	29.6946	279509100	89677960	0.320839	0.00233042	-50.1842	0.211962	0.0233042	-3130	-646	-15	-30	7
	Plesovice@28	2021-02-15 16:53:00	29.7591	277364200	88989360	0.320837	0.00258051	-50.189	0.207225	0.0258051	-3384	-656	-14	-29	5
	Plesovice@29	2021-02-15 16:57:00	29.6937	277682700	89088350	0.320828	0.00382253	-50.2168	0.179397	0.0382253	-2718	-1041	-14	-29	6
	Plesovice@30	2021-02-15 17:02:00	29.6625	279188000	89578950	0.320855	0.00332805	-50.1354	0.260809	0.0332805	125	-887	-6	-29	3
	Plesovice@31	2021-02-15 17:06:00	29.6408	277938600	89172130	0.320834	0.00317815	-50.1987	0.197456	0.0317815	1017	-1455	-6	-28	4
	Plesovice@32	2021-02-15 17:10:00	29.5446	276822700	88818450	0.32085	0.00325073	-50.1523	0.243934	0.0325073	1680	-1092	-4	-28	3
	Plesovice@33	2021-02-15 17:14:00	29.4727	276007400	88548420	0.320821	0.0017733	-50.2384	0.157786	0.017733	2433	-1754	0	-29	2
							0
Fig. 9B	91500@01	2021-02-24 03:17:00	31.781	312170800	100172600	0.320891	0.00325098	-50.0312	-0.033031	0.0325101	10	-29	33	-8	-9
	91500@02	2021-02-24 03:22:00	31.8074	311514900	99958770	0.320877	0.00312412	-50.0726	-0.0744768	0.0312415	-190	-29	31	-9	-7
	91500@03	2021-02-24 03:26:00	31.8292	311038100	99810060	0.32089	0.00383504	-50.0327	-0.0345113	0.0383488	-390	-29	26	-7	-5
	91500@04	2021-02-24 03:30:00	31.5809	307316300	98615270	0.320888	0.00221046	-50.0374	-0.0392479	0.0221051	-590	-29	28	-6	-5
	91500@05	2021-02-24 03:34:00	31.1992	306820300	98456560	0.320893	0.00353909	-50.0232	-0.0250379	0.0353921	-790	-29	28	-5	-5
	91500@06	2021-02-24 03:38:00	31.2292	310103100	99519280	0.320923	0.00347348	-49.9347	0.0634785	0.0347342	-990	-29	25	-6	-5
	91500@07	2021-02-24 03:43:00	31.5837	312251400	100208300	0.320922	0.00406718	-49.9379	0.060222	0.040672	-1190	-29	22	-9	-2
	91500@08	2021-02-24 03:47:00	31.6578	310871600	99764580	0.32092	0.00334153	-49.9436	0.0545972	0.0334163	-990	171	23	-9	-2
	91500@09	2021-02-24 03:51:00	31.4299	313293900	100551900	0.320955	0.00252668	-49.8399	0.158212	0.0252672	-790	171	24	-7	-2
	91500@10	2021-02-24 03:55:00	31.7303	312983300	100446300	0.320929	0.00286566	-49.9166	0.081537	0.0286565	-590	171	25	-7	-2
	91500@11	2021-02-24 04:00:00	31.702	313420300	100581200	0.320911	0.00358084	-49.9693	0.0288416	0.0358073	-390	171	26	-8	-4
	91500@12	2021-02-24 04:04:00	31.7954	312357200	100236900	0.320905	0.00300376	-49.9894	0.00871079	0.0300367	-190	171	29	-9	-7
	91500@13	2021-02-24 04:08:00	31.6861	312889800	100405900	0.320902	0.00338166	-49.996	0.00219788	0.0338163	10	171	32	-8	-6
	91500@14	2021-02-24 04:12:00	31.8534	314530700	100929700	0.32089	0.00303122	-50.0336	-0.0353994	0.0303117	10	371	34	-10	-9
	91500@15	2021-02-24 04:16:00	31.9358	311990300	100113000	0.320889	0.00302986	-50.0341	-0.0359915	0.0302985	-190	371	31	-10	-9
	91500@16	2021-02-24 04:21:00	31.7685	311031000	99827360	0.320914	0.00169088	-49.9601	0.0380189	0.0169087	-390	371	30	-8	-7
	91500@17	2021-02-24 04:25:00	31.55	308433200	98980730	0.320914	0.00457892	-49.9601	0.0380189	0.0457898	-590	371	29	-9	-6
	91500@18	2021-02-24 04:29:00	31.4261	313055100	100464000	0.320918	0.00301186	-49.9495	0.0486764	0.0301183	-790	371	25	-9	-3
	91500@19	2021-02-24 04:33:00	31.6617	315292000	101190000	0.320941	0.00312069	-49.8832	0.11499	0.0312077	-990	371	23	-11	-4
	91500@20	2021-02-24 04:37:00	31.8404	314241000	100846200	0.32092	0.00318302	-49.9441	0.0540051	0.0318301	-790	571	23	-13	-2
	91500@21	2021-02-24 04:42:00	31.6699	314214000	100845600	0.320948	0.0031389	-49.8601	0.138081	0.0313886	-590	571	27	-10	-4
	91500@22	2021-02-24 04:46:00	31.7658	314280300	100858200	0.320915	0.00324209	-49.9581	0.0400912	0.0324205	-390	571	29	-10	-4
	91500@23	2021-02-24 04:50:00	31.7635	312973200	100437000	0.320912	0.00406639	-49.9664	0.031802	0.0406642	-190	571	32	-10	-7
	91500@24	2021-02-24 04:54:00	31.7613	313831400	100704800	0.320888	0.00313403	-50.0383	-0.040136	0.0313399	-190	771	34	-12	-8
	91500@25	2021-02-24 04:58:00	31.718	306992500	98513990	0.320898	0.00270936	-50.0096	-0.01142	0.0270932	-390	771	33	-12	-8
	91500@26	2021-02-24 05:03:00	31.1637	304278300	97645790	0.320909	0.00409006	-49.9752	0.0229208	0.0409012	-590	771	31	-10	-5
	91500@27	2021-02-24 05:07:00	30.9549	305352300	97985940	0.320895	0.00301846	-50.0188	-0.0205973	0.0301844	-390	971	35	-12	-7
	Penglai@01	2021-02-24 01:57:00	31.4871	304358900	97666370	0.320888	0.00372778	-50.0374	-0.0392479	0.0372755	2025	-2961	13	4	-4
	Penglai@02	2021-02-24 02:01:00	31.4572	304842000	97817660	0.320877	0.00215878	-50.0714	-0.0732927	0.0215885	1825	-2761	14	1	-5
	Penglai@03	2021-02-24 02:06:00	31.3293	304082000	97575150	0.320881	0.00350646	-50.059	-0.0608589	0.0350636	2025	-2761	15	-1	-6
	Penglai@04	2021-02-24 02:10:00	31.3093	303792300	97478280	0.320873	0.00321082	-50.0818	-0.0836541	0.0321086	2225	-2761	17	0	-5
	Penglai@05	2021-02-24 02:14:00	31.3071	305324400	97967190	0.320863	0.00321234	-50.1138	-0.115627	0.0321245	2225	-2561	19	-5	-6
	Penglai@06	2021-02-24 02:18:00	31.3268	305031800	97872880	0.320861	0.00250367	-50.1179	-0.119771	0.0250371	2025	-2561	20	-4	-5
	Penglai@07	2021-02-24 02:22:00	31.3049	305603000	98059510	0.320875	0.00280477	-50.0783	-0.0801016	0.0280481	1825	-2561	18	-3	-5
	Penglai@08	2021-02-24 02:27:00	31.3499	307318800	98612550	0.320874	0.00293733	-50.0803	-0.0821739	0.0293736	2987	-2458	17	-11	-5
	Penglai@09	2021-02-24 02:31:00	31.3021	307528100	98678720	0.320871	0.00280457	-50.0895	-0.0913512	0.0280464	3187	-2658	16	-6	-4
	Penglai@10	2021-02-24 02:35:00	31.3982	307895900	98793820	0.320868	0.003323	-50.0993	-0.101121	0.03323	3387	-2658	15	-7	-4
	Penglai@11	2021-02-24 02:39:00	31.5649	310644000	99676050	0.320866	0.00320911	-50.1025	-0.104377	0.0320908	3587	-2658	16	-10	-6
	Penglai@12	2021-02-24 02:44:00	31.6638	308692800	99044910	0.320853	0.00328248	-50.1434	-0.145231	0.032824	3787	-2658	16	-10	-7
	Penglai@13	2021-02-24 02:48:00	31.5953	309083400	99171670	0.320857	0.003905	-50.1295	-0.131317	0.0390501	3987	-2858	18	-6	-8
	Penglai@14	2021-02-24 02:52:00	31.8041	304243500	97615690	0.320851	0.00369796	-50.1472	-0.149079	0.036979	3787	-2858	17	-5	-7
	Penglai@15	2021-02-24 02:56:00	31.4191	308340600	98943290	0.320889	0.00352053	-50.0341	-0.0359915	0.0352049	3387	-2858	13	-2	-4
	Penglai@16	2021-02-24 03:00:00	31.7355	308780700	99080520	0.320877	0.0032202	-50.0723	-0.0741808	0.0322028	3587	-3058	11	0	-4
	Penglai@17	2021-02-24 03:05:00	31.6912	308742200	99071610	0.320885	0.00326613	-50.0472	-0.0490173	0.0326619	3787	-3058	12	-1	-7
	Penglai@18	2021-02-24 03:09:00	31.6946	308145600	98869070	0.320855	0.0033628	-50.1375	-0.13931	0.033628	3987	-3058	16	-3	-7
	Penglai@19	2021-02-24 03:13:00	31.7677	306684300	98404080	0.320864	0.00341101	-50.1085	-0.110298	0.0341102	3987	-3258	13	2	-7
